# Supplementary material
Source: PubMed Central journal article supplement (PMC4880538)
Supplement: NIHMS781639-supplement-1.pdf [file NIHMS781639-supplement-1.pdf]

Figure S1

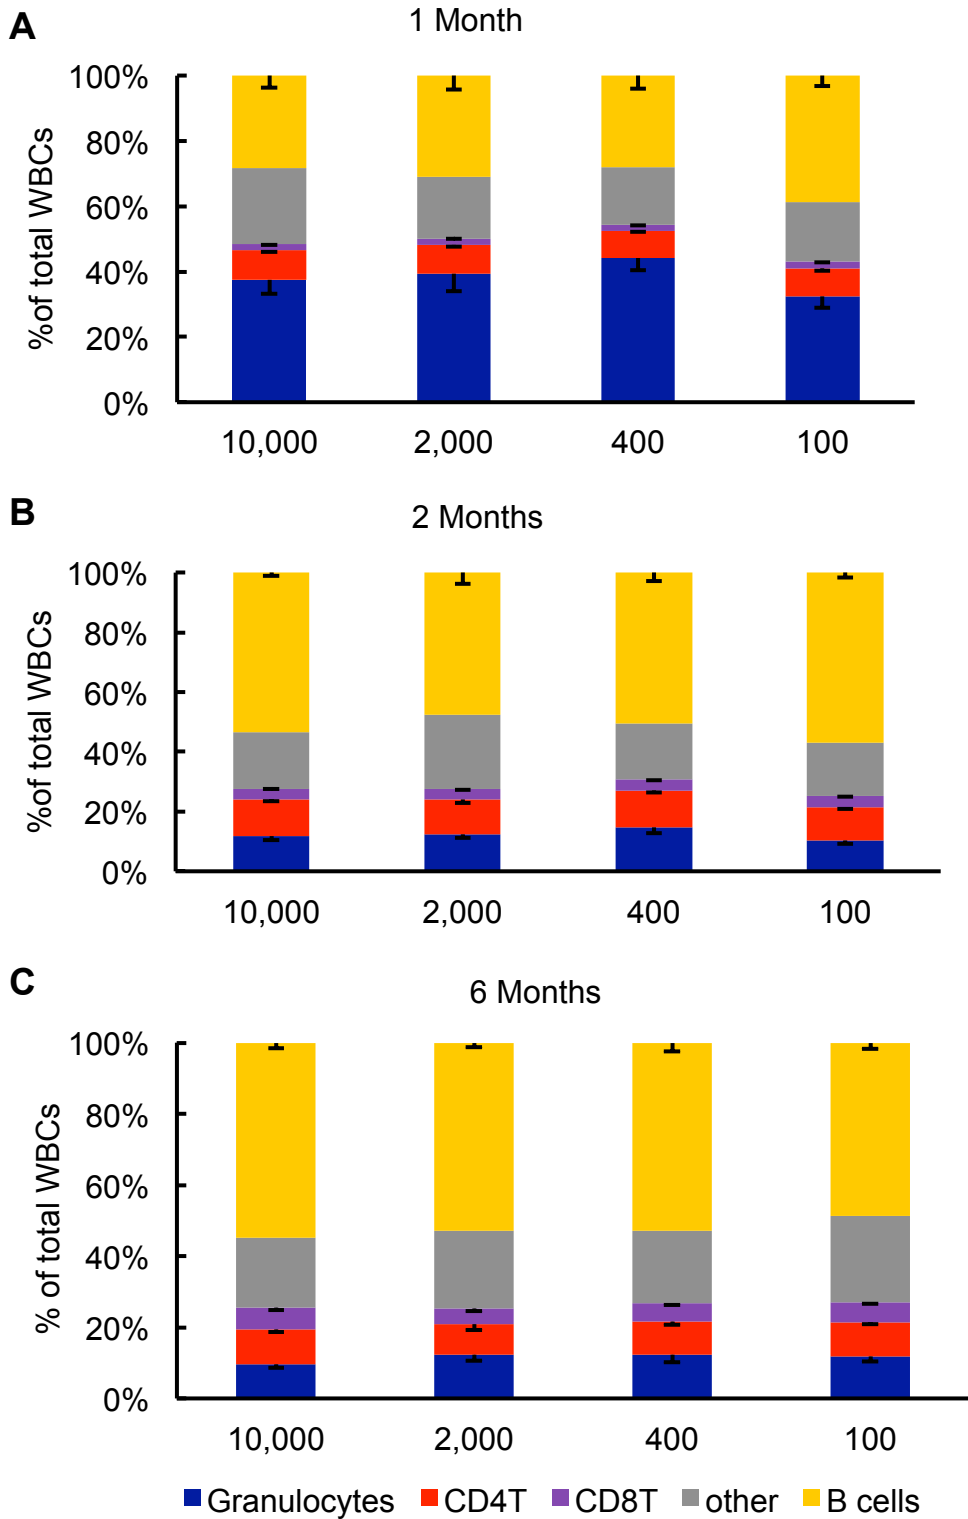

Figure S2

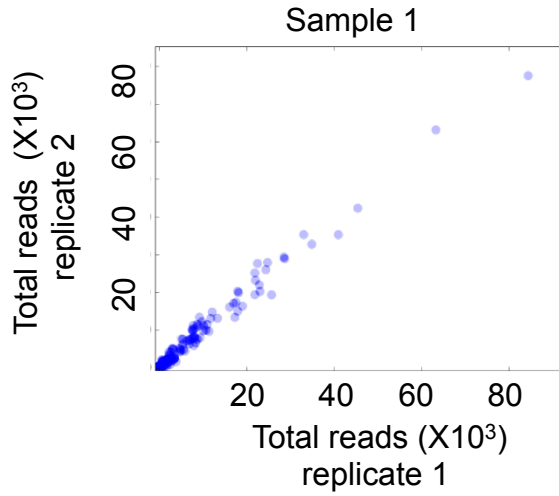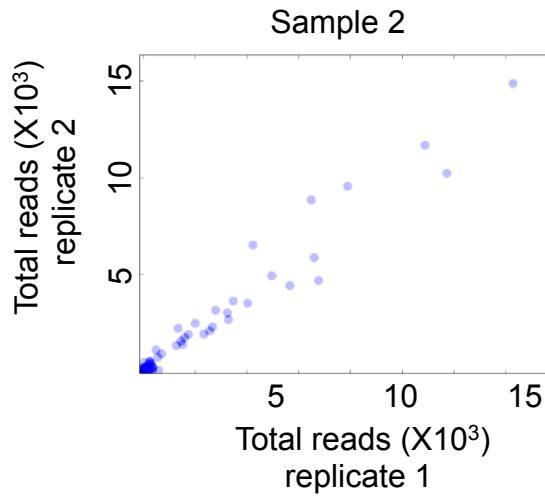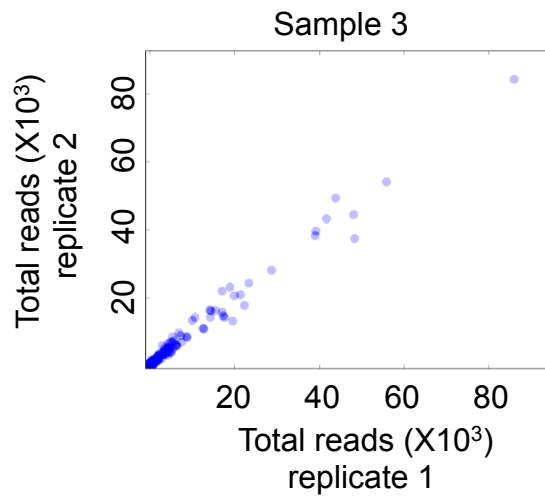

**Figure S3**

10,000 HSCs

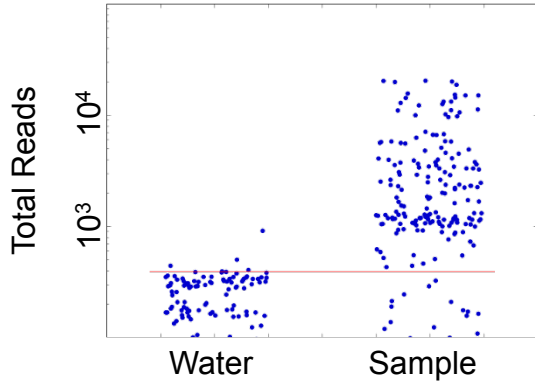

2,000 HSCs

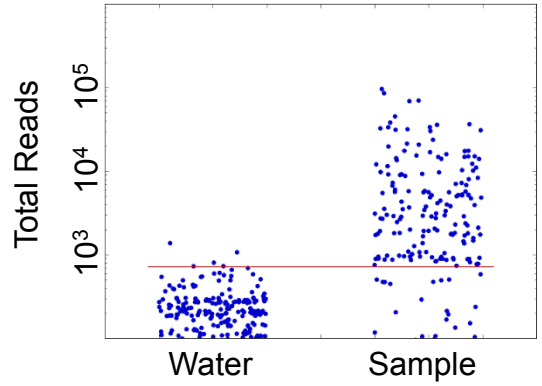

400 HSCs

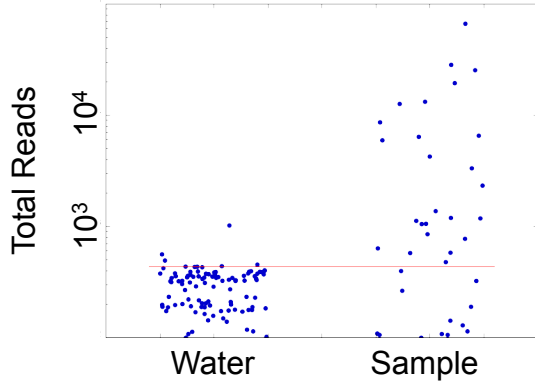

100 HSCs

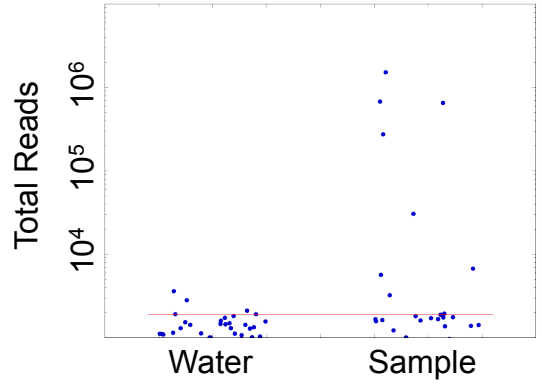

**Figure S4**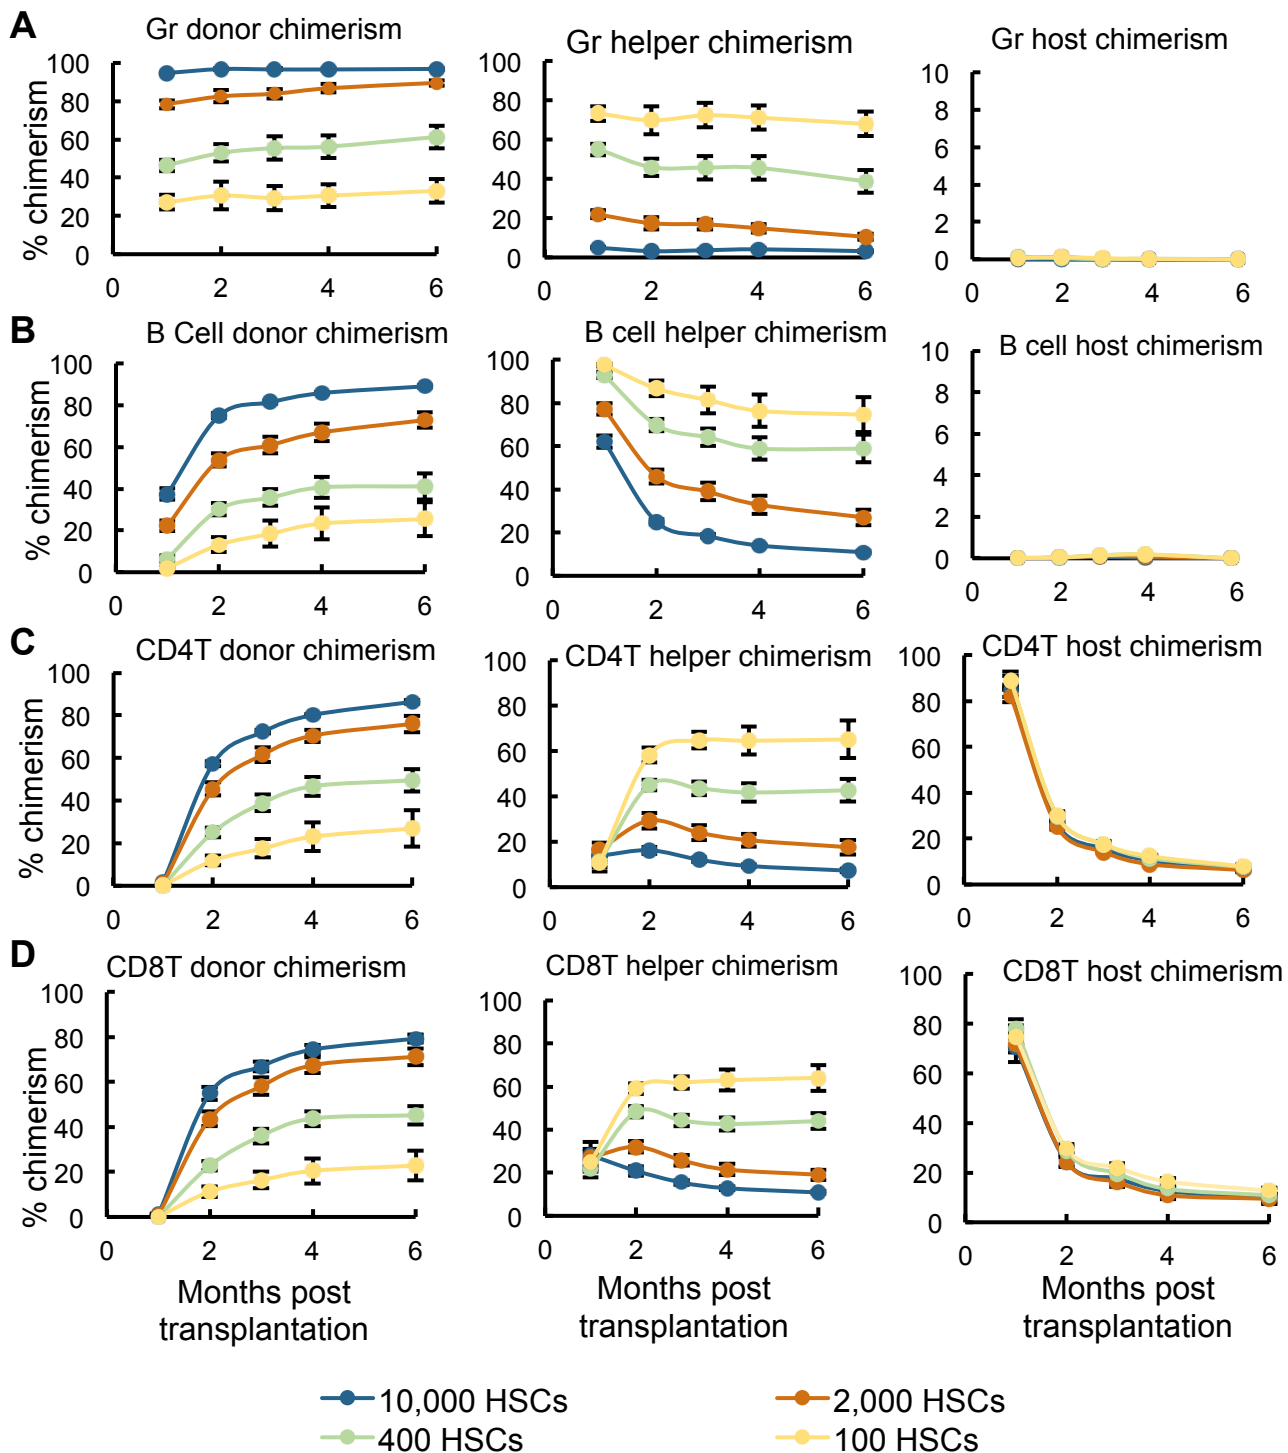

**Figure S5**

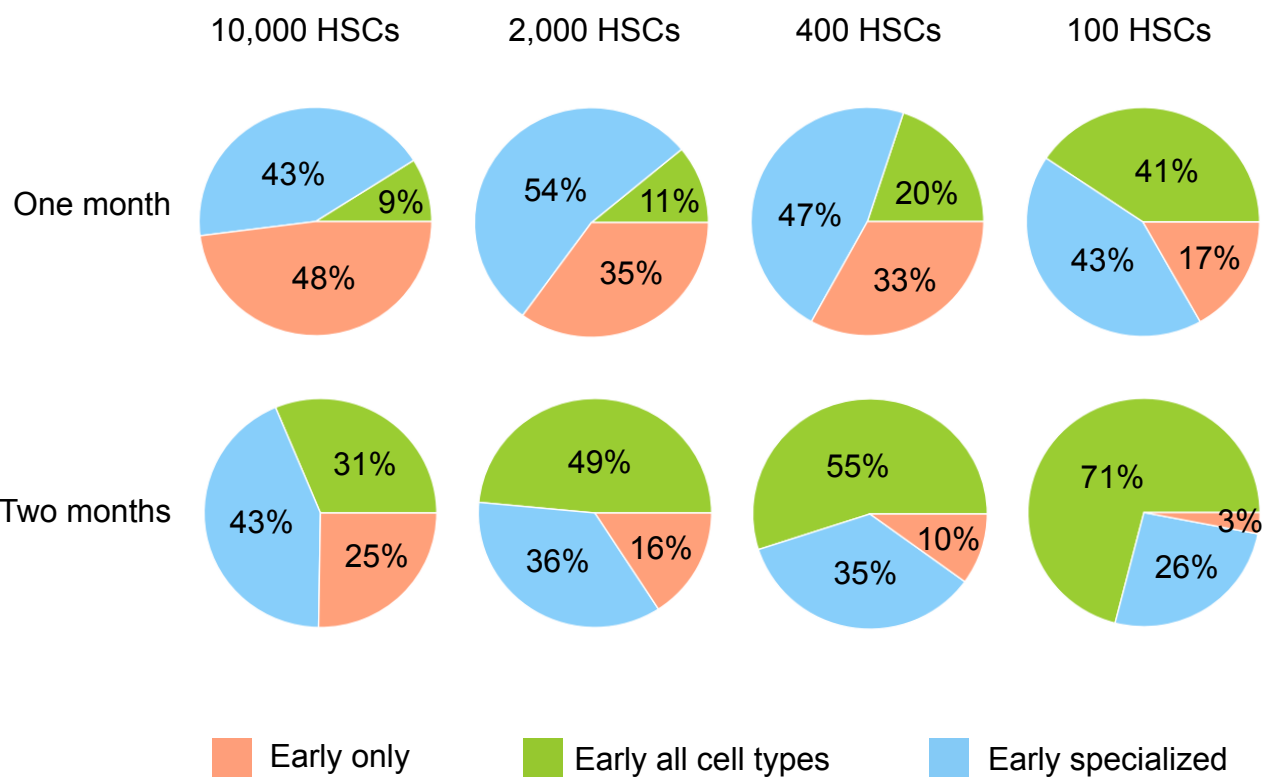

Figure S6

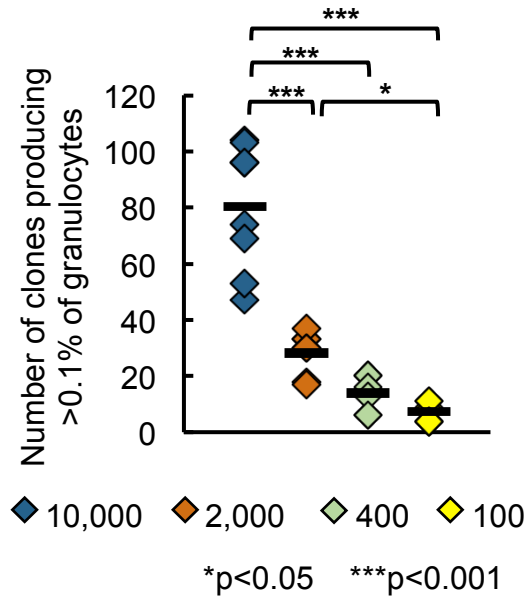

Figure S7

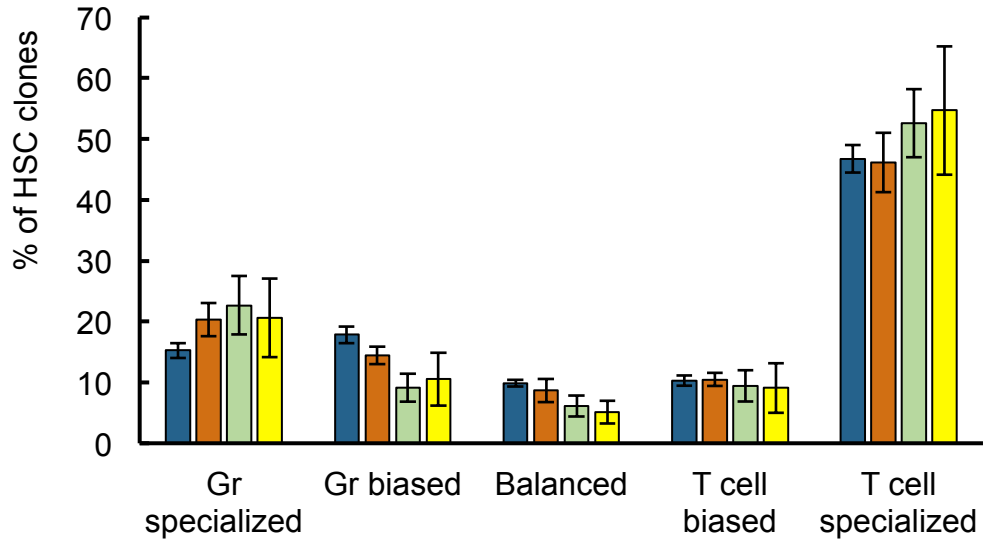

**Figure S1. White Blood Cell Population Size at Various HSC Transplantation Doses. *Related to Figure 1.***

(A–C) White blood cell population sizes were measured (A) one, (B) two, and (C) six months after transplantation by flow cytometry. Bar segments represent group means. Error bars represent standard error of the mean. 7-8 mice were used per transplantation dose.

**Figure S2. Replicate Analysis of barcode quantification. *Related to Figure 1.***

Blood samples were lysed and split into replicate samples. Replicates were separately extracted for genomic DNA, amplified by PCR, and quantified using high throughput sequencing. Each data point represents a single barcode. The x and y axes represent the abundance of a barcode in each replicate sample.

**Figure S3. Removal of Sequencing Background. *Related to Figure 1.***

Molecular grade water was processed via PCR and sent for sequencing. False positive barcodes detected in the water were quantified. Barcodes from actual samples were only considered valid if they exceeded 99% of the signals from water samples. Each graph shows the barcodes of a mouse sample compared to the water sample. Each blue dot represents a barcode. The red line represents the 99% threshold.

**Figure S4. Chimerism over Time at Different Transplantation Doses. *Related to Figure 1.***

(A–D) Donor, helper, and host chimerisms in (A) granulocytes, (B) B cells, (C) CD4T cells, and (D) CD8T cells were measured monthly by flow cytometry. Data points represent group means. Error bars depict standard error of the mean. 7-8 mice were used per transplantation dose.

**Figure S5. Early Granulocyte Production Changes with HSC Dose. *Related to Figure 5.***

Pie charts show the percent of granulocyte production by each category of clones one and two months after transplantation. Values are the mean percentage for each HSC dose group. See also Tables S6-S7. 7-8 mice were used per transplantation dose.

**Figure S6. Alternate Methods of Computing Clonal Dominance Produce Similar Results. *Related to Figure 6.***

The number of clones that produced more than 0.1% of all granulocytes at each HSC transplantation dose. Each diamond represents one mouse; horizontal black lines represent group means.

**Figure S7. Lineage Bias Analysis of Granulocytes vs. T cells. *Related to Figure 7.***

Granulocyte production was compared to T-cell production for each HSC clone. A clone was considered to be “specialized” to a cell type if it only produced that cell type, “biased” to a cell type if it favored the production of that cell type, and “balanced” if its relative production of the two cell types was similar. The mean percent is displayed for each HSC dose. Error bars represent the standard error of the mean. 7-8 mice were used per transplantation dose.



**Table S1**

|      | 1 month |      |     | 2 months |      |     | 6 months |      |     |    |    |
|------|---------|------|-----|----------|------|-----|----------|------|-----|----|----|
|      | 10000   | 2000 | 400 | 10000    | 2000 | 400 | 10000    | 2000 | 400 |    |    |
| 2000 | ***     |      |     | 2000     | ***  |     | 2000     | ***  |     |    |    |
| 400  | ***     | NS   |     | 400      | ***  | **  | 400      | ***  | *   |    |    |
| 100  | ***     | **   | NS  | 100      | ***  | *** | NS       | 100  | *** | ** | NS |

NS, not significant

\*p<0.05 \*\*p<0.01 \*\*\*p<0.001

**Table S2**

| Early-differentiating |       |      |     |
|-----------------------|-------|------|-----|
|                       | 10000 | 2000 | 400 |
| 2000                  | ***   |      |     |
| 400                   | ***   | *    |     |
| 100                   | ***   | ***  | NS  |

| All cell types |       |      |     |
|----------------|-------|------|-----|
|                | 10000 | 2000 | 400 |
| 2000           | ***   |      |     |
| 400            | ***   | NS   |     |
| 100            | ***   | *    | NS  |

| Early and all cell types |       |      |     |
|--------------------------|-------|------|-----|
|                          | 10000 | 2000 | 400 |
| 2000                     | ***   |      |     |
| 400                      | ***   | *    |     |
| 100                      | ***   | **   | NS  |

| Early and specialized |       |      |     |
|-----------------------|-------|------|-----|
|                       | 10000 | 2000 | 400 |
| 2000                  | NS    |      |     |
| 400                   | **    | NS   |     |
| 100                   | ***   | *    | NS  |

| Early only |       |      |     |
|------------|-------|------|-----|
|            | 10000 | 2000 | 400 |
| 2000       | ***   |      |     |
| 400        | ***   | *    |     |
| 100        | ***   | **   | NS  |

| Late and all cell types |       |      |     |
|-------------------------|-------|------|-----|
|                         | 10000 | 2000 | 400 |
| 2000                    | *     |      |     |
| 400                     | ***   | NS   |     |
| 100                     | ***   | NS   | NS  |

| Specialized |       |      |     |
|-------------|-------|------|-----|
|             | 10000 | 2000 | 400 |
| 2000        | ***   |      |     |
| 400         | ***   | NS   |     |
| 100         | ***   | **   | NS  |

| Late and specialized |       |      |     |
|----------------------|-------|------|-----|
|                      | 10000 | 2000 | 400 |
| 2000                 | **    |      |     |
| 400                  | *     | NS   |     |
| 100                  | ***   | NS   | NS  |

NS, not significant

\* $p < 0.05$  \*\* $p < 0.01$  \*\*\* $p < 0.001$

**Table S3**

| Early-differentiating |       |      |     |
|-----------------------|-------|------|-----|
|                       | 10000 | 2000 | 400 |
| 2000                  | NS    |      |     |
| 400                   | NS    | NS   |     |
| 100                   | **    | **   | NS  |

| All cell types |       |      |     |
|----------------|-------|------|-----|
|                | 10000 | 2000 | 400 |
| 2000           | NS    |      |     |
| 400            | NS    | NS   |     |
| 100            | NS    | NS   | NS  |

| Early and all cell types |       |      |     |
|--------------------------|-------|------|-----|
|                          | 10000 | 2000 | 400 |
| 2000                     | NS    |      |     |
| 400                      | NS    | NS   |     |
| 100                      | NS    | NS   | NS  |

| Early and specialized |       |      |     |
|-----------------------|-------|------|-----|
|                       | 10000 | 2000 | 400 |
| 2000                  | NS    |      |     |
| 400                   | NS    | NS   |     |
| 100                   | NS    | NS   | NS  |

| Early only |       |      |     |
|------------|-------|------|-----|
|            | 10000 | 2000 | 400 |
| 2000       | NS    |      |     |
| 400        | NS    | NS   |     |
| 100        | NS    | NS   | NS  |

| Late and all cell types |       |      |     |
|-------------------------|-------|------|-----|
|                         | 10000 | 2000 | 400 |
| 2000                    | ***   |      |     |
| 400                     | ***   | NS   |     |
| 100                     | ***   | NS   | NS  |

| Specialized |       |      |     |
|-------------|-------|------|-----|
|             | 10000 | 2000 | 400 |
| 2000        | NS    |      |     |
| 400         | NS    | NS   |     |
| 100         | NS    | NS   | NS  |

| Late and specialized |       |      |     |
|----------------------|-------|------|-----|
|                      | 10000 | 2000 | 400 |
| 2000                 | NS    |      |     |
| 400                  | NS    | NS   |     |
| 100                  | **    | **   | NS  |

NS, not significant

\*\*p<0.01 \*\*\*p<0.001

**Table S4**

| Gr 10,000 |      |       |     | Gr 2,000 |      |       |     | Gr 400 |      |       |    | Gr 100 |      |       |     |
|-----------|------|-------|-----|----------|------|-------|-----|--------|------|-------|----|--------|------|-------|-----|
| L all     | L Sp | E all |     | L all    | L Sp | E all |     | L all  | L Sp | E all |    | L all  | L Sp | E all |     |
| L Sp      | NS   |       |     | L Sp     | NS   |       |     | L Sp   | NS   |       |    | L Sp   | NS   |       |     |
| E all     | ***  | ***   |     | E all    | **   | **    |     | E all  | **   | *     |    | E all  | ***  | ***   |     |
| E Sp      | NS   | NS    | NS  | E Sp     | NS   | NS    | **  | E Sp   | NS   | NS    | NS | E Sp   | NS   | NS    | *** |
| B 10,000  |      |       |     | B 2,000  |      |       |     | B 400  |      |       |    | B 100  |      |       |     |
| L all     | L Sp | E all |     | L all    | L Sp | E all |     | L all  | L Sp | E all |    | L all  | L Sp | E all |     |
| L Sp      | NS   |       |     | L Sp     | NS   |       |     | L Sp   | *    |       |    | L Sp   | NS   |       |     |
| E all     | ***  | ***   |     | E all    | ***  | ***   |     | E all  | *    | NS    |    | E all  | **   | ***   |     |
| E Sp      | **   | **    | *** | E Sp     | *    | *     | *** | E Sp   | NS   | NS    | NS | E Sp   | NS   | NS    | *** |
| 4T 10,000 |      |       |     | 4T 2,000 |      |       |     | 4T 400 |      |       |    | 4T 100 |      |       |     |
| L all     | L Sp | E all |     | L all    | L Sp | E all |     | L all  | L Sp | E all |    | L all  | L Sp | E all |     |
| L Sp      | NS   |       |     | L Sp     | NS   |       |     | L Sp   | NS   |       |    | L Sp   | NS   |       |     |
| E all     | ***  | ***   |     | E all    | ***  | ***   |     | E all  | ***  | ***   |    | E all  | ***  | ***   |     |
| E Sp      | **   | **    | *** | E Sp     | **   | **    | *** | E Sp   | *    | *     | *  | E Sp   | NS   | NS    | *** |
| 8T 10,000 |      |       |     | 8T 2,000 |      |       |     | 8T 400 |      |       |    | 8T 100 |      |       |     |
| L all     | L Sp | E all |     | L all    | L Sp | E all |     | L all  | L Sp | E all |    | L all  | L Sp | E all |     |
| L Sp      | NS   |       |     | L Sp     | NS   |       |     | L Sp   | NS   |       |    | L Sp   | NS   |       |     |
| E all     | ***  | ***   |     | E all    | ***  | ***   |     | E all  | ***  | ***   |    | E all  | ***  | ***   |     |
| E Sp      | ***  | ***   | *** | E Sp     | **   | **    | *** | E Sp   | **   | *     | NS | E Sp   | NS   | NS    | *** |

L all, Late and all cell types; L Sp, Late and specialized; E all, Early and all cell types; E Sp, Early and specialized; NS, not significant

\*p<0.05 \*\*p<0.01 \*\*\*p<0.001

**Table S5**

| Gr - Late and all      |      |     |    | Gr - Late and Sp      |      |     |    | Gr - Early and all      |      |     |    | Gr – Early and Sp      |      |     |    |
|------------------------|------|-----|----|-----------------------|------|-----|----|-------------------------|------|-----|----|------------------------|------|-----|----|
| 10000                  | 2000 | 400 |    | 10000                 | 2000 | 400 |    | 10000                   | 2000 | 400 |    | 10000                  | 2000 | 400 |    |
| 2000                   | NS   |     |    | 2000                  | NS   |     |    | 2000                    | NS   |     |    | 2000                   | NS   |     |    |
| 400                    | *    | NS  |    | 400                   | NS   | NS  |    | 400                     | NS   | NS  |    | 400                    | NS   | NS  |    |
| 100                    | *    | NS  | NS | 100                   | NS   | NS  | NS | 100                     | NS   | NS  | NS | 100                    | NS   | NS  | NS |
| B cell - Late and all  |      |     |    | B cell - Late and Sp  |      |     |    | B cell - Early and all  |      |     |    | B cell - Early and Sp  |      |     |    |
| 10000                  | 2000 | 400 |    | 10000                 | 2000 | 400 |    | 10000                   | 2000 | 400 |    | 10000                  | 2000 | 400 |    |
| 2000                   | NS   |     |    | 2000                  | NS   |     |    | 2000                    | NS   |     |    | 2000                   | NS   |     |    |
| 400                    | **   | NS  |    | 400                   | *    | **  |    | 400                     | NS   | *   |    | 400                    | NS   | NS  |    |
| 100                    | **   | NS  | NS | 100                   | NS   | NS  | NS | 100                     | NS   | NS  | *  | 100                    | **   | NS  | NS |
| 4T cell - Late and all |      |     |    | 4T cell – Late and Sp |      |     |    | 4T cell - Early and all |      |     |    | 4T cell – Early and Sp |      |     |    |
| 10000                  | 2000 | 400 |    | 10000                 | 2000 | 400 |    | 10000                   | 2000 | 400 |    | 10000                  | 2000 | 400 |    |
| 2000                   | **   |     |    | 2000                  | NS   |     |    | 2000                    | NS   |     |    | 2000                   | NS   |     |    |
| 400                    | ***  | NS  |    | 400                   | NS   | NS  |    | 400                     | NS   | NS  |    | 400                    | NS   | NS  |    |
| 100                    | ***  | NS  | NS | 100                   | NS   | NS  | NS | 100                     | NS   | NS  | NS | 100                    | NS   | NS  | NS |
| 8T cell - Late and all |      |     |    | 8T cell - Late and Sp |      |     |    | 8T cell - Early and all |      |     |    | 8T cell – Early and Sp |      |     |    |
| 10000                  | 2000 | 400 |    | 10000                 | 2000 | 400 |    | 10000                   | 2000 | 400 |    | 10000                  | 2000 | 400 |    |
| 2000                   | NS   |     |    | 2000                  | NS   |     |    | 2000                    | NS   |     |    | 2000                   | NS   |     |    |
| 400                    | ***  | NS  |    | 400                   | NS   | NS  |    | 400                     | NS   | NS  |    | 400                    | NS   | NS  |    |
| 100                    | **   | NS  | NS | 100                   | *    | NS  | NS | 100                     | NS   | NS  | NS | 100                    | NS   | NS  | NS |

Late and all, Late and all cell types; Late and Sp, Late and specialized;  
 Early and all, Early and all cell types; Early and Sp, Early and specialized;  
 NS, not significant

\*p<0.05 \*\*p<0.01 \*\*\*p<0.001

**Table S6**

| 1 month all cell types |       |      |     | 1 month Sp |       |      |     | 1 month early only |       |      |     |
|------------------------|-------|------|-----|------------|-------|------|-----|--------------------|-------|------|-----|
|                        | 10000 | 2000 | 400 |            | 10000 | 2000 | 400 |                    | 10000 | 2000 | 400 |
| 2000                   | NS    |      |     | 2000       | NS    |      |     | 2000               | NS    |      |     |
| 400                    | NS    | NS   |     | 400        | NS    | NS   |     | 400                | *     | NS   |     |
| 100                    | **    | *    | NS  | 100        | NS    | NS   | NS  | 100                | ***   | *    | *   |
| 2 month all cell types |       |      |     | 2 month Sp |       |      |     | 2 month early only |       |      |     |
|                        | 10000 | 2000 | 400 |            | 10000 | 2000 | 400 |                    | 10000 | 2000 | 400 |
| 2000                   | NS    |      |     | 2000       | NS    |      |     | 2000               | NS    |      |     |
| 400                    | NS    | NS   |     | 400        | NS    | NS   |     | 400                | *     | NS   |     |
| 100                    | **    | NS   | NS  | 100        | NS    | NS   | NS  | 100                | **    | NS   | NS  |

Sp, Specialized; NS, not significant

**Table S7**

| 1 month 10,000  |     |     | 1 month 2,000  |     |    | 1 month 400  |     |    | 1 month 100  |     |    |
|-----------------|-----|-----|----------------|-----|----|--------------|-----|----|--------------|-----|----|
|                 | all | Sp  |                | all | Sp |              | all | Sp |              | all | Sp |
| Sp              | *** |     | Sp             | *** |    | Sp           | *   |    | Sp           | NS  |    |
| e.o.            | *** | NS  | e.o.           | *   | *  | e.o.         | NS  | NS | e.o.         | NS  | NS |
| 2 months 10,000 |     |     | 2 months 2,000 |     |    | 2 months 400 |     |    | 2 months 100 |     |    |
|                 | all | Sp  |                | all | Sp |              | all | Sp |              | all | Sp |
| Sp              | **  |     | Sp             | NS  |    | Sp           | NS  |    | Sp           | **  |    |
| e.o.            | NS  | *** | e.o.           | **  | *  | e.o.         | *   | NS | e.o.         | *** | NS |

all, all cell types; Sp, specialized; e.o., Early only;  
NS, not significant

\*p<0.05 \*\*p<0.01 \*\*\*p<0.001

**Table S1. Significance Values for the Line Graph Shown in Figure 2A. Related to Figure 2.**

Significance of the comparisons between HSC dose groups for the number of granulocyte-producing clones detected at each time point. NS, not significant.

**Table S2. Significance Values for the Number of Clones in Each Category of the Venn Diagrams Shown in Figure 4. Related to Figure 4.**

Significance of the comparisons between HSC dose groups. NS, not significant.

**Table S3. Significance Values for the Proportion of Clones in Each Category of the Venn Diagrams Shown in Figure 4. Related to Figure 4.**

Significance of the comparisons between HSC dose groups. NS, not significant.

**Table S4. Significance Values for the Comparisons of Blood Production by Each Category of the Pie Charts Shown in Figure 5. Related to Figure 5.**

Significance of the comparisons for each cell type and HSC dose. L all, late and all cell types; L Sp, late and specialized; E all, early and all cell types; E Sp, early and specialized; NS, not significant.

**Table S5. Significance Values for the Comparisons of Blood Production at Each Transplantation Dose of the Pie Charts Shown in Figure 5. Related to Figure 5.**

Significance of the comparisons for each cell type and category of clonal blood production. Late and All, late and all cell types; Late and Sp, late and specialized; Early and All, early and all cell types; Early and Sp, early and specialized; NS, not significant.

**Table S6. Significance Values for the Comparisons of Granulocyte Production at Each HSC Transplantation Dose Group of the Pie Charts Shown in Figure S5. Related to Figure 5.**

Significance of the comparisons for each category of clone and time point. Sp, Early specialized; NS, not significant.

**Table S7. Significance Values for the Comparisons of Granulocyte Production by Each Category of the Pie Charts Shown in Figure S5. Related to Figure 5.**

Significance of the comparisons for each time point and HSC transplantation dose. Sp, Early specialized; all, Early all cell types; e.o., early only; NS, not significant.
